# Supplementary material for: Pan-tissue transcriptome analysis of long noncoding RNAs in the American beaver Castor canadensis
Source: PubMed Central journal article supplement (PMC7014947; doi:10.1186/s12864-019-6432-4), 2020-02-12

Density

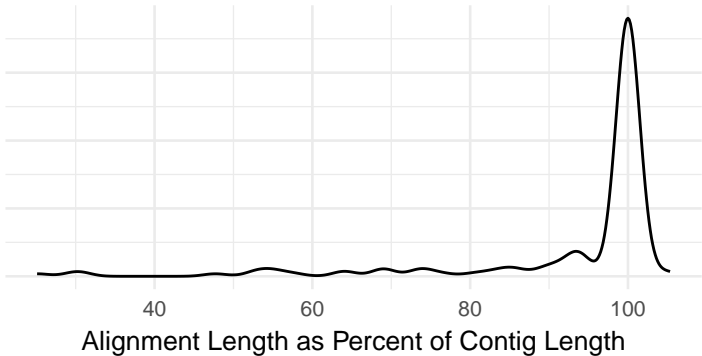

Supplement: 12864_2019_6432_MOESM1_ESM.pdf [file 12864_2019_6432_MOESM1_ESM.pdf]
