# Supplementary material for: Pan-tissue transcriptome analysis of long noncoding RNAs in the American beaver Castor canadensis
Source: PubMed Central journal article supplement (PMC7014947; doi:10.1186/s12864-019-6432-4), 2020-02-12

$\log_2(1 + \text{CanadaCount})$

20

15

10

5

0

0.0

2.5

5.0

7.5

10.0

12.5

$\log_2(1 + \text{OSUcount})$

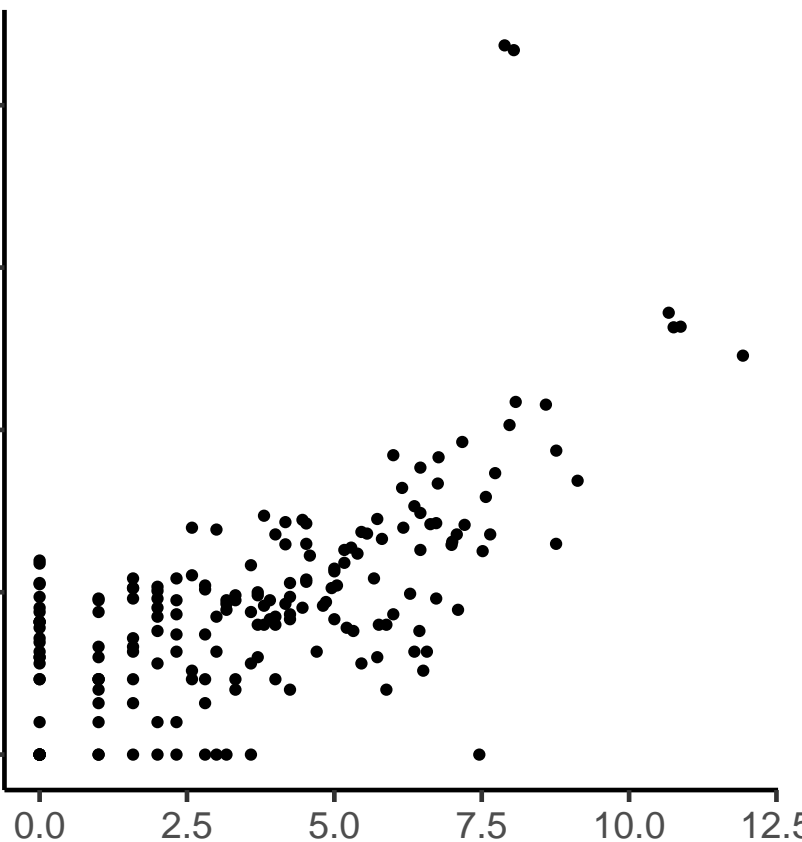

Supplement: 12864_2019_6432_MOESM2_ESM.pdf [file 12864_2019_6432_MOESM2_ESM.pdf]
